# PSYCHIATRYonline

Your Destination for Lifelong Learning in Psychiatry

The one-stop resource for information on diagnosis, treatment, guidelines, the latest research, and breaking news from the field.

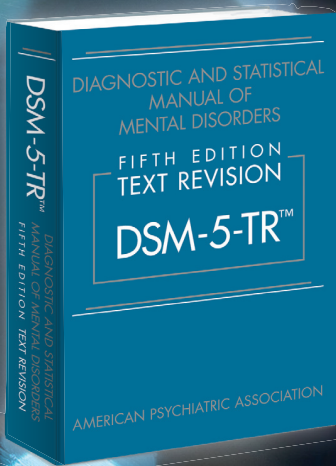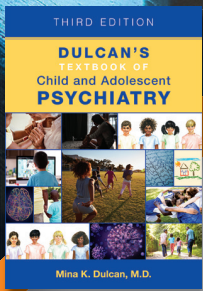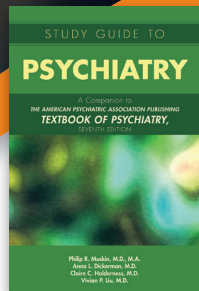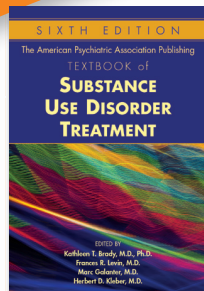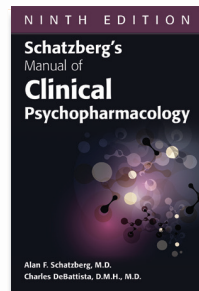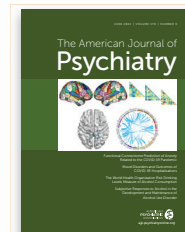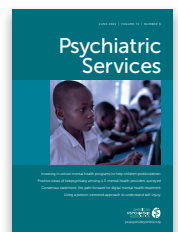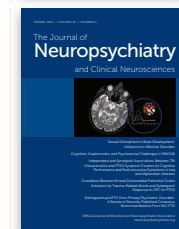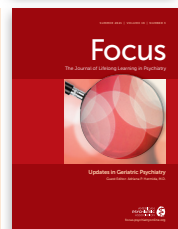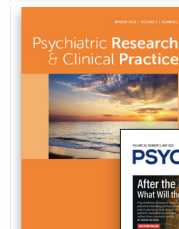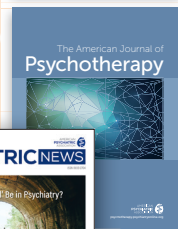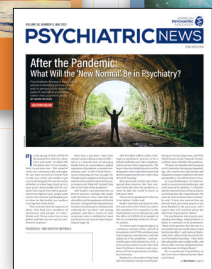

**PsychiatryOnline.org** is the platform for all American Psychiatric Association Publishing journals, *DSM-5-TR™*, and bestselling textbooks, as well as APA Practice Guidelines, and continuing medical education.

This is a one-stop resource for information on psychiatric diagnosis, treatment, guidelines, the latest research, and breaking news from the field. From a single location, users can search across all books and journals to find the most relevant content easier than ever.

Subscribe to products individually or to the DSM Select package that includes the DSM-5® library, books and select journals.

**Go to [www.appi.org](http://www.appi.org) to subscribe.**

*Institutional subscription options are available.*

For more information contact: [institutions@psych.org](mailto:institutions@psych.org);  
800-368-5777 ext. 3729

AMERICAN  
PSYCHIATRIC  
ASSOCIATION  
PUBLISHING   
[psychiatryonline.org](http://psychiatryonline.org)
