# The American Journal of Psychiatry

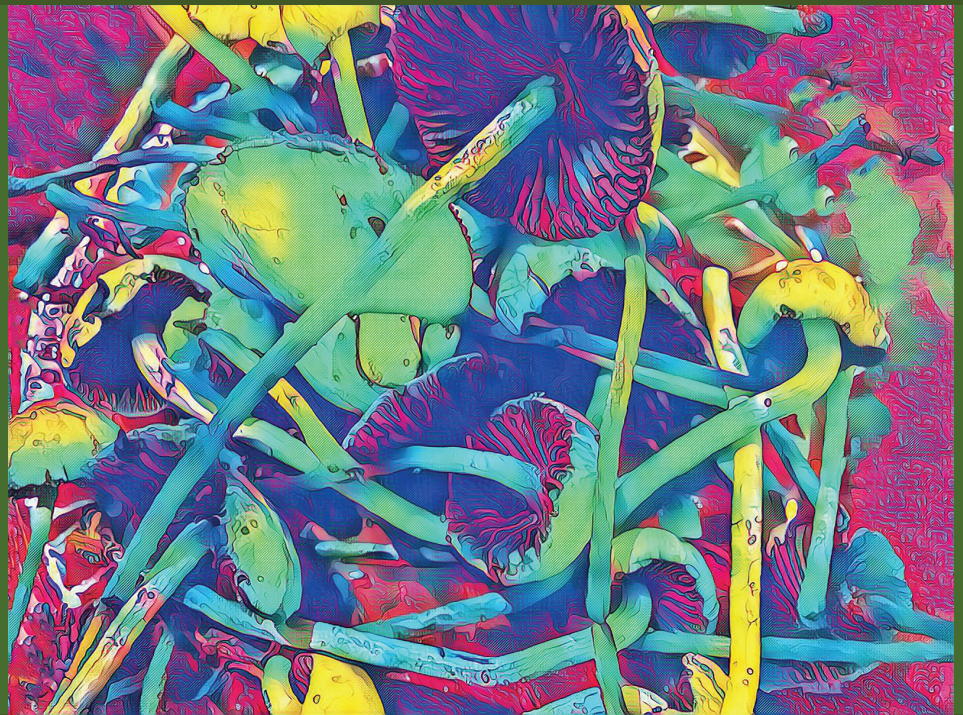

Must Psilocybin Always “Assist Psychotherapy”?

Psychotropic Drug-Related Weight Gain and Its Treatment

Recent Secular Trends of Body Mass Index in Individuals  
With Bipolar Disorders and in the General Population

Predicting Acute Changes in Suicidal Ideation and Planning:  
A Longitudinal Study of Symptom Mediators  
and the Role of the Menstrual Cycle
